# Supplementary figures and images for: FoxO6-mediated IL-1β induces hepatic insulin resistance and age-related inflammation via the TF/PAR2 pathway in aging and diabetic mice
Source: PubMed Central journal article supplement — Redox Biol. 2019 Apr 3;24:101184. doi: 10.1016/j.redox.2019.101184 (PMC6454229; doi:10.1016/j.redox.2019.101184), 2019-04-03

**Ntg**

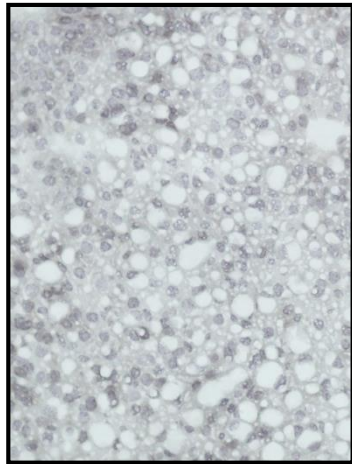

**FoxO6-KO**

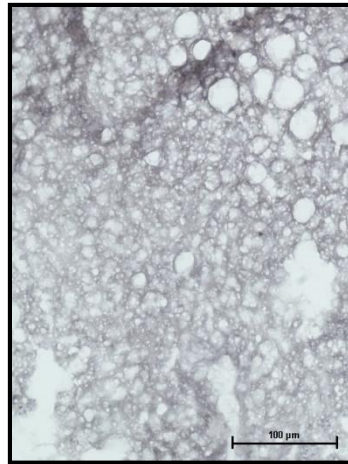

**Supplementary Fig. 1.**

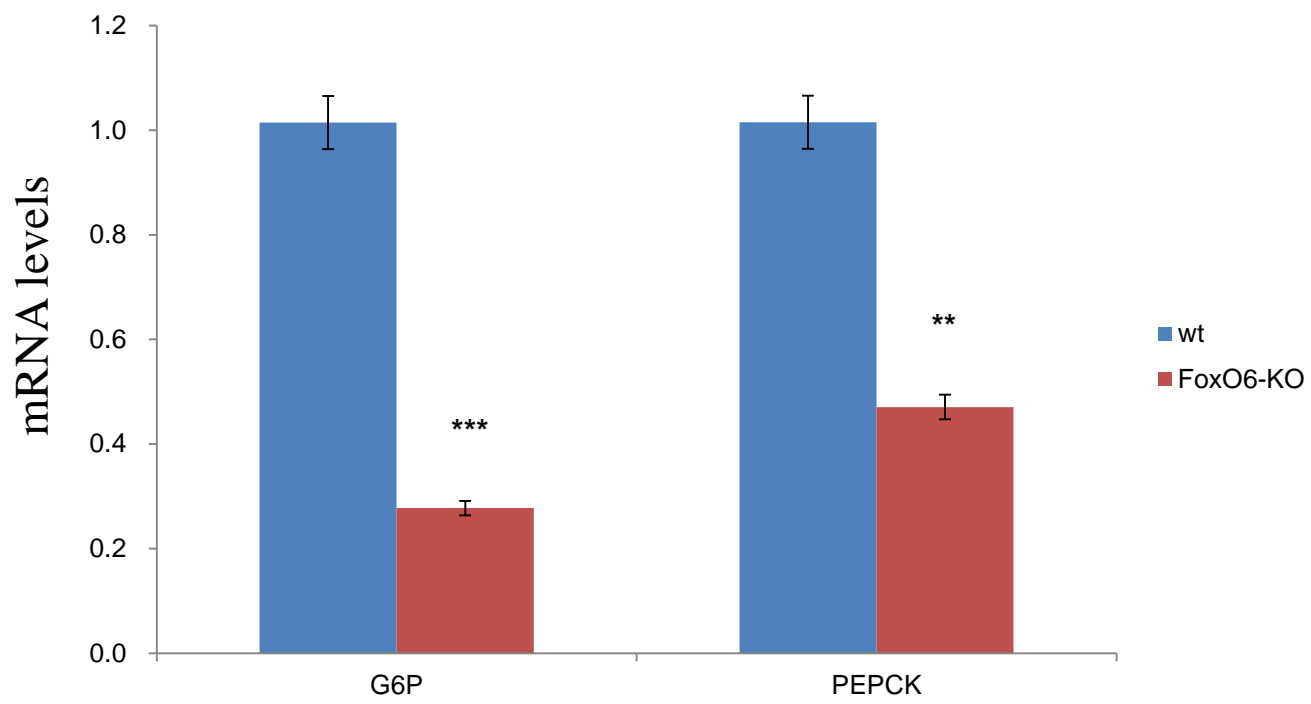

**Supplementary Fig. 2.**

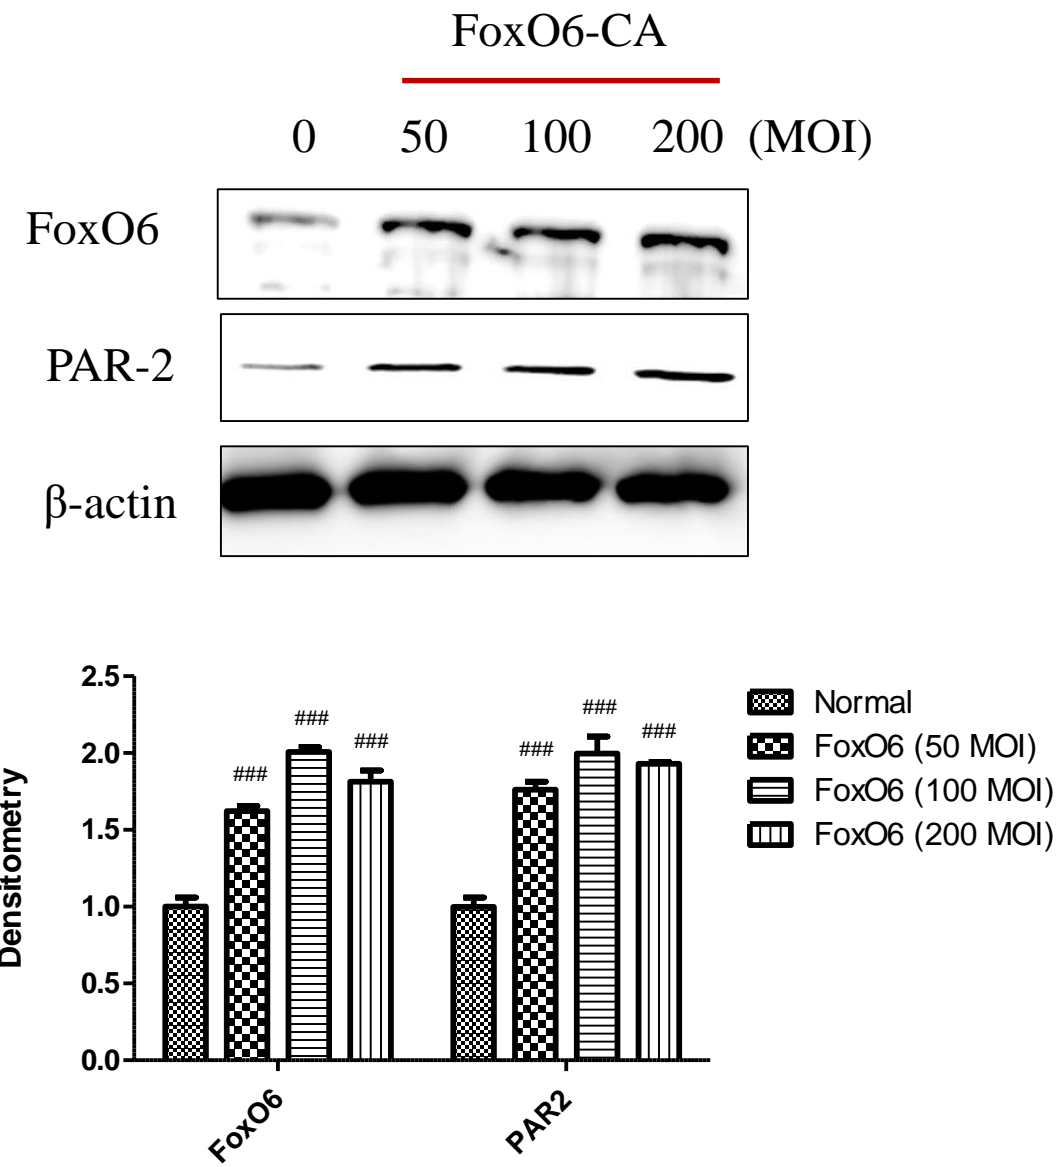

**Supplementary Fig. 3.**

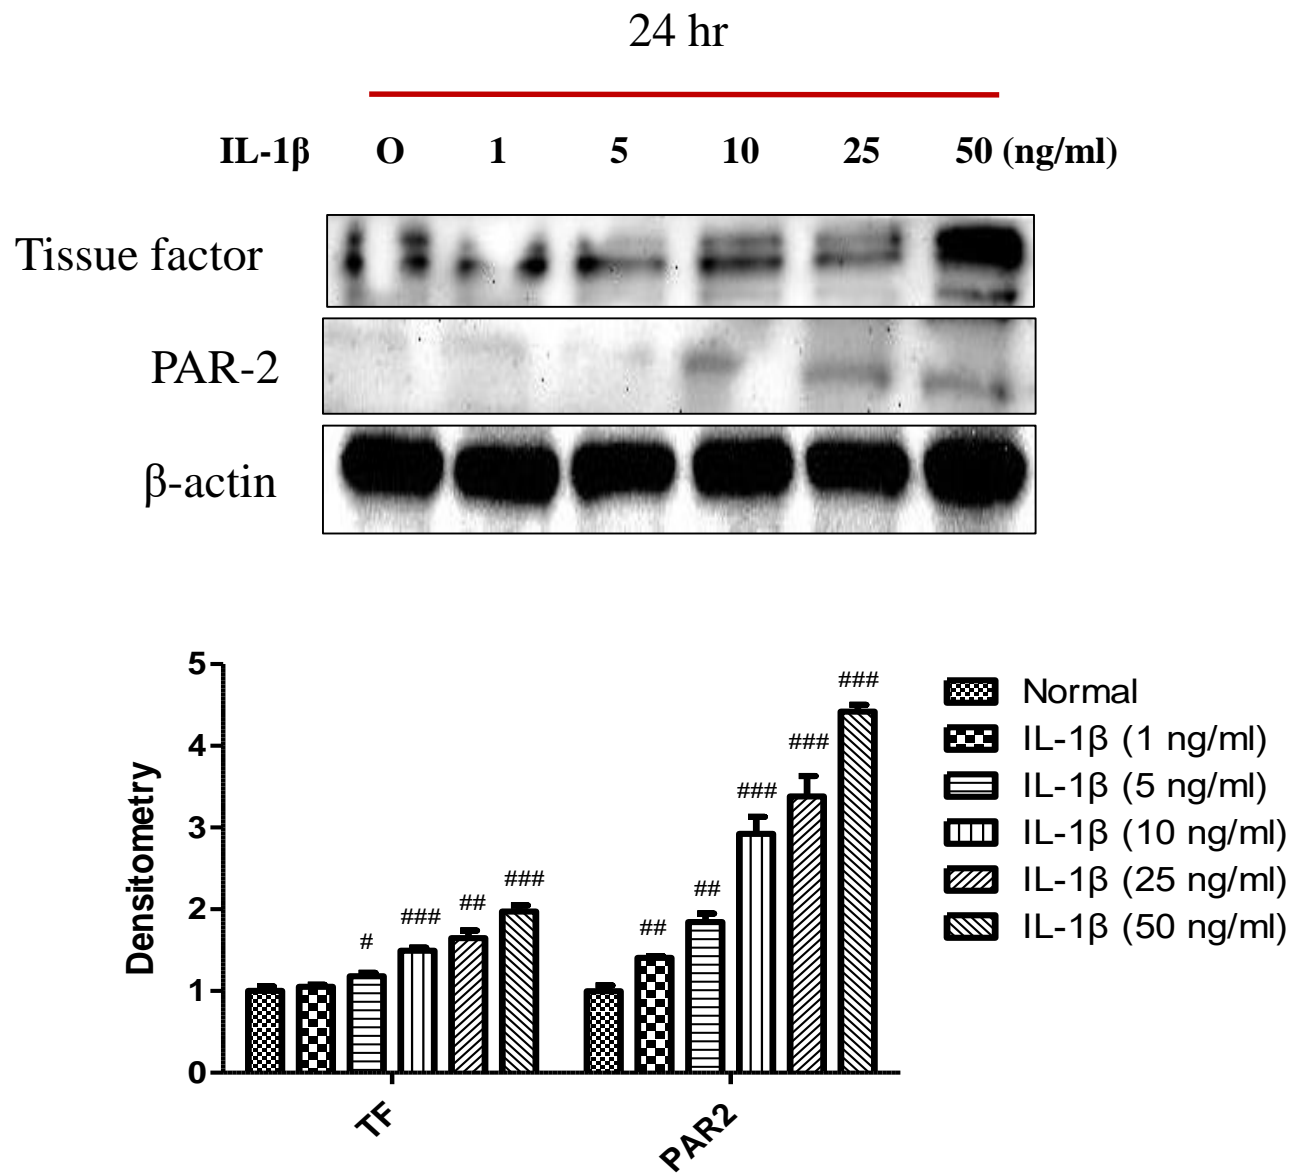

Supplementary Fig. 4.

Supplement: mmc1.pdf [file mmc1.pdf]
